# Supplementary material for: Network Pharmacology Study to Reveal the Potentiality of a Methanol Extract of Caesalpinia sappan L. Wood against Type-2 Diabetes Mellitus
Source: MDPI journal article supplement (doi:10.3390/life12020277), 2022-02-13
Supplement: s1 [file s1]

Table S1. Compound related gene:

| Genes from STP (844 genes) | Genes from SEA (489 genes) |
|----------------------------|----------------------------|
| AKR1B1                     | RNPEP                      |
| PTGDR2                     | NAALAD2                    |
| CPA1                       | ACHE                       |
| CA2                        | CHRNA3                     |
| KMO                        | CHRNA4                     |
| FUCA1                      | ACR                        |
| FBP1                       | AKR1C3                     |
| GPR17                      | MAOB                       |
| SLC13A5                    | CA12                       |
| FOLH1                      | CA14                       |
| CA1                        | CA5A                       |
| CA3                        | CA5B                       |
| CA12                       | CA6                        |
| CA14                       | CA7                        |
| CA5B                       | CELA1                      |
| CA13                       | BCHE                       |
| EGFR                       | CYP1A1                     |
| ACE                        | CYP1B1                     |
| FYN                        | CTBP2                      |
| LCK                        | HSD17B14                   |
| MGAM                       | HSD17B1                    |
| SI                         | HSD17B2                    |
| MME                        | ELANE                      |
| CA9                        | GABRB1                     |
| MAOA                       | SLC2A4                     |
| MAOB                       | KCNK9                      |
| MIF                        | KYNU                       |
| CA7                        | MMP1                       |
| ESR2                       | MMP9                       |
| CA6                        | MTNR1A                     |
| CA4                        | MTNR1B                     |
| CA5A                       | MB                         |
| KDM2A                      | PDK3                       |
| PHF8                       | PDK4                       |
| KDM5C                      | UQCRB                      |
| KDM4E                      | SRD5A2                     |
| GBA                        | SPR                        |
| FUCA2                      | STS                        |
| KDM4A                      | TTR                        |
| SLC16A1                    | PAM                        |

GABRR1  
KDM4C  
HCAR2  
GLB1  
GANAB  
KDM3A  
KDM6B  
FTO  
TPMT  
CAD  
EGLN3  
PYGL

ITGAL ICAM1 ITGB2  
CASP3  
GAA  
OGA  
UGCG  
GABBR2 GABBR1  
TDP2  
EGLN1  
ALPL  
NAALAD2  
ALOX5  
MMP9  
MMP1  
MMP2  
AKR1C3  
HSPA1A  
AKR1C2  
CPA3  
CPB2  
LTA4H  
AMPD3  
KDM7A  
APEX1  
LAP3  
REN  
AKR1A1  
ACHE  
PTGS1  
PTGS2  
BACE1  
MAN1B1

METAP2  
PIN4  
PPID  
PPM1B  
BRSK2  
CA3  
CA2  
COQ8A  
COQ8B  
DBH  
ESR1  
ESR2

CSNK1A1L  
LATS1  
LATS2  
MBD2  
OXSRI  
PIK3C2G  
PIP4K2B  
PIP5K1A  
PIP5K1C  
RIPK4  
TRPM6  
TYR  
GPR84  
ALOX5  
MPEG1  
CDC25A  
CDC25C  
TYMP  
HTR2A  
APP  
ABCG2  
AHR  
AKR1C2  
AKR1C4  
GFER  
AOC3  
BAZ2A  
BAZ2B  
BRD7  
BRD9  
CYP11B1

HSP90AA1  
ODC1  
NGFR  
ADA  
MAN2B1  
CACNA2D1  
CASP6  
CASP7  
CASP8  
CASP2  
SLC22A6  
F2  
ECE1  
LIG1  
GABBR1  
GBA2  
ACLY  
CYP1A2  
MB  
ADORA1  
ADORA2A  
HSD17B3  
DAO  
NQO2  
FADS1  
JAK1  
JAK2  
TYK2  
KCNMA1  
PNP  
GPR84  
HDAC6  
HDAC2  
PARP1  
HDAC8  
PTPN1  
RPS6KA3  
GRM5  
ALOX15  
FEN1  
NAT1  
COMT  
VEGFA  
GSK3B

CYP11B2  
CALM1  
CYP17A1  
CYP1A2  
CYP2D6  
CYP2C19  
CYP3A4  
CSF1R  
DHFR  
ERBB3  
ERN1  
FOS  
G6PC  
GRIK2  
GYS1  
JUN  
KYAT3  
KLK7  
RPS6KB2  
ABCB1  
SLC16A3  
NCOA1  
NCOA3  
NFKB1  
NFE2L2  
NOX1  
NQO1  
NQO2  
PLA2G2A  
PARP10  
CD274  
CBFB  
MPO  
PDGFRB  
PHLPP2  
PPP5C  
QPCTL  
SLC13A5  
SLC5A4  
CXCL12  
TAAR1  
MAPT  
TUBB1  
RELA

|                  |          |
|------------------|----------|
| HSD17B2          | TNFRSF1A |
| CDC7             | TAS1R1   |
| MET              | TAS1R3   |
| DCTPP1           | TSPO     |
| FABP4            | HSD3B1   |
| CDK2 CCNA1 CCNA2 | ABCB11   |
| CDK9 CCNT1       | ADCY10   |
| TTR              | AR       |
| PSMB5            | SERPINA6 |
| IDO1             | CD4      |
| BRAF             | CDC45    |
| TDO2             | CYP19A1  |
| PLAU             | CRYAB    |
| EPAS1            | HSD17B3  |
| KDR              | HSD17B7  |
| ADAMTS5          | DHCR24   |
| CXCR2            | HSD11B2  |
| ERBB2            | POLA1    |
| MKNK1            | EBP      |
| PDE5A            | EPHA1    |
| MGLL             | EPHA2    |
| TUBB1            | EPHA3    |
| TLR9             | EPHA4    |
| NOS1             | EPHA5    |
| PLA2G10          | EPHA6    |
| CHRNA4 CHRN2     | EPHA8    |
| DHFR             | EPHA7    |
| DRD1             | EPHB1    |
| SRC              | EPHB2    |
| TMIGD3           | EPHB3    |
| NOS2             | EPHB6    |
| TOP2A            | FGF1     |
| CCNE1 CDK2       | FGF2     |
| DYRK1A           | G6PD     |
| PTPRC            | NR3C1    |
| DYRK2            | GPBAR1   |
| PTK2B            | NR3C2    |
| DYRK1B           | CDC25B   |
| TNKS2            | ABCC4    |
| TNKS             | NPC1     |
| UPP1             | NPC1L1   |
| KMT5A            | NR1H3    |
| CES1             | NR1H4    |

SLC9A1  
PIM1  
GSTA1  
PRKD1  
PIM2  
AURKB  
CDK2  
CDK1  
METAP2  
AURKA  
MERTK  
ELANE  
HTR2B  
ADRA2A  
CDK5R1 CDK5  
ADRA2C  
ADRA2B  
KLKB1  
HTR2A  
NISCH  
PRSS1  
CTRC  
CTRB1  
SLC6A3  
CYP19A1  
PDE10A  
CYP11B1  
CYP11B2  
CYP2A6  
CYP17A1  
CTSK  
STAT3  
HTT  
TBXAS1  
KCNK2  
TYMS  
PRKCA  
EPHX1  
SLC6A4  
PDE4A  
TAAR1  
CHRNA3 CHRNA4  
ADRA1A  
HRH3

NR1I2  
SLC10A2  
SLC10A1  
ATIC  
RORA  
SLC22A1  
SLC22A3  
SRD5A1  
SHBG  
ST3GAL1  
ST6GAL1  
SREBF2  
VDR  
CISD1  
QDPR  
ABAT  
NMUR2  
ALDH5A1  
ACER2  
NDUFAB1  
ADH1A  
ADH1B  
ADH7  
APEX1  
CERT1  
NDUFAF1  
CNR1  
CNR2  
DAGLA  
POLB  
POLL  
POLM  
DNM1  
ENPP2  
CES1  
CES2  
FAAH  
FABP3  
GPR174  
GPR18  
GPR34  
HMGCR  
EPHX1  
EPHX2

|                                      |          |
|--------------------------------------|----------|
| CHRM1                                | KAT2B    |
| LIPE                                 | KAT5     |
| CHRNA4                               | KDM5A    |
| GRM4                                 | PRKCA    |
| SLC6A2                               | PRKCE    |
|                                      |          |
| PSEN2 PSENEN NCSTN APH1A PSEN1 APH1B | LPAR1    |
| CSNK2A1                              | LPAR2    |
| P2RX7                                | LPAR3    |
| CHRM5                                | LPAR4    |
| CHRM2                                | LPAR5    |
| NOS3                                 | LPAR6    |
| NAAA                                 | LY96     |
| MPO                                  | SELP     |
| GRM2                                 | SLC25A20 |
| GPR35                                | NAAA     |
| PABPC1                               | NDUFA1   |
| NR3C1                                | NDUFA3   |
| PGR                                  | NDUFA2   |
| MCL1                                 | NDUFA5   |
| VDR                                  | NDUFA4   |
| LRRK2                                | NDUFA7   |
|                                      |          |
| GABRB3 GABRG2 GABRA5                 | NDUFA9   |
| PIK3CD PIK3R1                        | NDUFA8   |
| TGM2                                 | NDUFA6   |
| ADH1A                                | NDUFA11  |
| CTSH                                 | NDUFA10  |
| CTSC                                 | NDUFA12  |
| CTSF                                 | NDUFA13  |
| CTSS                                 | NDUFB1   |
| CTSV                                 | NDUFB3   |
| ADH1C                                | NDUFB2   |
| CTSL                                 | NDUFB4   |
| CTSB                                 | NDUFB5   |
| FABP1                                | NDUFB6   |
| HDAC3                                | NDUFB7   |
| TRPA1                                | NDUFB8   |
| PTPN22                               | NDUFB10  |
| XDH                                  | NDUFB11  |
| MPI                                  | NDUFC1   |
|                                      |          |
| GABRB3 GABRG2 GABRA1                 | NDUFB9   |

GABRA2 GABRB3 GABRG2  
DBH  
HDAC1  
RNASEH1

TNNC1 TNNT2 TNNI3  
BCL2L1  
SNCA  
TYR  
PDGFRB  
FGFR1  
NQO1  
SQLE  
SRD5A1  
SRD5A2  
AR  
SERPINA6  
NR3C2  
SHBG  
DRD2  
DRD4  
SIGMAR1  
HSD11B1  
NR1I3  
HTR7  
TRPV1  
FAAH  
CCR5  
CHRM3  
SIRT2  
PDE7A  
THRB  
DRD3  
EPHX2

GABRB3 GABRA3 GABRG2

GABRG2 GABRB3 GABRA6  
NPC1L1  
DNMT3A  
CACNA1B  
PPARA  
CTSD

NDUFC2  
NDUFAF2  
NDUFAF3  
NDUFAF4

NDUFS2  
NDUFS3  
NDUFS4  
NDUFS5  
NDUFS6  
NDUFS1  
NDUFS7  
NDUFS8  
NDUFV1  
NDUFV2  
NDUFV3  
NOD1  
SMPD2  
MT-ND1  
MT-ND2  
MT-ND3  
MT-ND4L  
MT-ND4  
MT-ND5  
MT-ND6  
NDUFA4L2  
OXER1  
P2RY10  
PAFAH1B2  
PLA2G4B  
PLA2G5  
PLA2G2C  
PLA2G10  
PDCD4

POLH

POLK  
PPARA  
PPARG  
PTPN13  
SLC22A6  
SLC22A8

FABP5  
PPARD  
MTNR1A  
MTNR1B  
OPRL1  
MAPK3  
PRKCH  
HSD11B2  
PTPN11  
AKR1B10  
SOAT1  
POLB  
PLA2G1B  
ACP1  
PIN1  
KCNH2  
GSR  
CHEK1  
CHRM4  
GLI2  
GLI1  
PDE4B  
ABCG2  
PTPN6  
TSPO  
P35218  
Q9Y2D0  
BCHE  
NR1I2  
PTPN2  
CDC25A  
ADORA3  
PTGES  
ESR1  
FNTA FNTB  
FDFT1  
RORA  
G6PD  
CES2  
HMGCR  
CYP51A1  
MDM2  
HSD17B7  
HTR6

SLCO2A1  
SPHK1  
SPTLC2  
SPTLC1  
IARS1  
TLR2  
TLR4  
TOP2A  
TRPV1  
ADH1C  
GSTK1  
ENPEP  
BHMT  
BBOX1  
CBS  
CYP4F2  
FABP4  
FFAR4  
GABBR1  
GABBR2  
GABRQ  
GABRR1  
GNAI1  
GNAI3  
GNAO1  
GSR  
GSTA1  
GSTM1  
KDM2A  
KDM4A  
KDM4C  
KDM7A  
ALOX12  
LTB4R  
MGLL  
PTGER2  
PTGER3  
PTGER4  
PTGFR  
PTGIR  
ACP1  
PPARD  
RARB  
S1PR2



NPY5R  
OXTR  
KIF11  
CNR1  
TACR1  
SCN9A  
KCNA5  
ICMT  
CRHR1  
CYP24A1  
CYP27A1  
MDM4  
CYP2C9  
GPR88  
MCHR1  
TNF  
FABP3  
OPRK1  
KIT  
C5AR1  
MAPK10  
MAPK9  
CXCR3  
PIM3  
TDP1  
IKBKB  
CYP3A4  
ADCY10  
BRD4  
ERN1  
GRIA2  
PPARG  
FFAR1  
CNR2  
SCD  
NR1H3  
OPRD1  
HRH4  
SLC6A9  
GCGR  
MAPK14  
GCK  
QPCT  
IMPDH2

S1PR3  
S1PR4  
SLC6A11  
TBXA2R  
TBXAS1  
THRB  
TOP1  
ABCC8  
C1R  
CA11  
CASP4  
CASP9  
CTSV  
CACNG8  
CCNE1  
CFTR  
HSPA1A  
IDO2  
KCNMA1  
PASK  
PNMT  
PGR  
PTPRC  
SLC27A2  
SNCA  
TLR9  
TSSK2  
HTR1A  
HTR7  
AADAT  
ADRA1A  
ADRA1B  
ANTXR2  
CACNA1S  
ODC1  
HSD11B1  
DRD2  
DRD3  
FGB  
KCNB1  
IKBKG  
NFATC1  
HCRTR1  
HCRTR2

HTR2C  
GPR119  
LIMK2  
ROCK2  
ASAH1  
GRIN1 GRIN2B  
CALCRL  
PFKFB3  
ALOX5AP  
EPHB4  
CSF1R  
ABL1  
GRIN2B  
RARA  
YES1  
RORC  
OPRM1  
CD38  
LYPLA1  
CASR  
LYPLA2  
BRPF1  
CALCRL RAMP1  
BCL2  
CHRNA7  
CYP26A1  
TERT  
PTPRF  
CSNK1D  
FABP2  
UGT2B7  
NR1H4  
CPT1A  
PTGER4  
RARG  
RARB  
LDLR  
HPGD  
GNRHR  
PLA2G4A  
GRK2  
PAFAH1B2  
ACACB  
SLC1A1

PARP2  
S100A4  
SLC6A12  
SLC6A13  
TNKS  
ADK  
ASIC3  
FTO  
P2RX7  
SLC22A2  
SLC47A1  
EP300  
GLO1  
IGF2R  
STK17B  
GPR183  
AKR1C1  
SLC1A3  
LNPEP  
DNTT  
PPIB  
PPIG  
ADORA3  
ANO1  
MAOA  
CA13  
CA4  
CBR1  
CYP2C8  
CREB1  
EDNRB  
ELAVL1  
ELAVL3  
ERAP1  
RCE1  
HNF4A  
IL2  
KCND3  
RPS6KA3  
LRP6  
MDH1  
ABCC1  
NEK6  
NOX4

|                      |         |
|----------------------|---------|
| APP                  | NR4A2   |
| MTTP                 | F2RL3   |
| APOB                 | P4HB    |
| IDH1                 | PTGS2   |
| CHEK2                | ALPI    |
| CDK4                 | PTPRS   |
| PTGFR                | TERT    |
| PLK1                 | XDH     |
| CLK4                 | ALDH2   |
| CLK1                 | AXIN2   |
| CLK2                 | CTDSP1  |
| GPBAR1               | PDF     |
| SMO                  | EDNRA   |
| LTB4R                | GPR55   |
| TOP1                 | KCNA3   |
| CDC25B               | LYPLA1  |
| PDE4D                | LYPLA2  |
| ALOX12               | PDE4B   |
| PTGER2               | PDE4D   |
| SLC22A12             | ALPL    |
| PTGER1               | RAD51   |
| RXRB                 | SENP7   |
| PTGIR                | CASP7   |
| CD81                 | GBA2    |
| CYP26B1              | AGL     |
| OXER1                | GAA     |
| FFAR4                | PTH1R   |
| PREP                 | RGS4    |
| TRPM8                | RGS8    |
| MAPK1                | SI      |
| IL6                  | CA1     |
| GLUL                 | CYP24A1 |
| EDNRA                | CYP27B1 |
| CMA1                 | GLI1    |
| CTSG                 | NR1H2   |
| CCKBR                | RORC    |
| ENPP2                | SHH     |
| HNF4A                | F2      |
| RBP4                 | GC      |
| PTGDR                | ALKBH3  |
| PRKAG1 PRKAB1 PRKAA2 | BCL2L10 |
| TAS2R31              | BCAT1   |
| RAF1                 | F7      |

PORCN  
F2R  
LSS  
ATP12A  
FASN  
ACACA  
STS  
PTAFR  
MPEG1  
MAPKAPK2  
NAMPT  
HCRTR2  
HDAC10  
HPGDS  
F10  
DAGLA  
PLG  
PLAT  
DGAT1  
ALDH2  
RASGRP3  
MMP13  
GLS  
PIK3CA  
DCK  
UNG  
AKT1  
RPS6KB1  
EIF2AK3  
CYP27B1  
MTOR  
MAPT  
SSTR4  
AKR1C1  
GCKR  
PGGT1B FNTA  
HLCS  
PAOX  
ADH1B  
ADH7  
AHR  
TBXA2R  
PRMT3  
DHODH

HPN  
ITK  
NPY5R  
PLG  
DHODH  
RB1  
SMARCA2  
VCP  
PLAT  
PRSS1  
PLAU  
BDKRB2  
CCR8  
CD38  
CRHR1  
COPS5  
ENPP3  
HPRT1  
RAD52  
TOP2B

MC4R

GABRA2 GABRB2 GABRG2

SCN2A

SCN10A

HSD17B1

ALDH1A1

CENPE

PPIA

GSK3A

EZR

PDK1

RET

CCNB3 CDK1 CCNB1 CCNB2

PTK2

WEE1

NOX4

NOX1

SLC29A1

MMP3

EP300

PITRM1

SLC5A1

BACE2

THRA

FLT3

EZH2

MAPK8

RBBP4 RBBP7 EED SUZ12 EZH2

MAP2K1

MMP14

PAK4

PBRM1

ANPEP

SMARCA4

ADORA2B

HIF1A

ITGAL

HTR1B

HTR5A

HCRTR1

MGAT2

HTR3A  
HTR1A  
PDE2A  
GABRA1  
CDK9  
GABRA5  
JAK3  
SLC6A1  
CFTR  
FLT1  
LDHA  
TACR3  
MYLK  
FKBP1A

GABRA1 GABRB2 GABRG2  
PRKCG  
CCND1 CDK4  
METAP1  
RPS6KA5  
SIRT1  
CASP4  
CASP9  
PIP4K2C  
ADRA1D  
IRAK4  
CREBBP  
PIK3CD  
MALT1  
ITK  
BLM  
PDE4C  
ROCK1  
PRKACA  
F2RL1  
PIK3C2A  
PRKDC  
PIK3CB  
PIK3CG  
PIK3C2B  
AADAT  
BCAT2  
KYAT3  
CYP2C19

DPYD  
KCNJ5 KCNJ3  
TYMP  
CXCR1  
PHLPP2  
DUSP3  
RIPK2  
HRH2  
HRH1  
IGF1R  
MAP2K7  
ADK  
ABCC1  
ABCC8 KCNJ11  
AKT2  
S1PR1  
ALK  
CHUK  
RELA  
ADAM17  
PLA2G6  
CEL  
CCR4  
CCR2  
CAMK2D  
MAPK13  
GLP1R  
MAP4K4  
ALDH3A1  
PDPK1  
CSNK2A2  
MMP8  
GABRB3

GABRB1 GABRG2 GABRA1  
CDK1 CCNB1  
CDK7 CCNH  
DPP7  
DPP8  
DNM1  
ITGA2B ITGB3  
NCOR2 HDAC3  
DPP9  
RNPEP

DNPEP  
DPP4  
PLA2G2C  
ADH4  
HDAC11  
GRM1  
S1PR3  
CETP  
BRS3  
KISS1R  
NMBR  
NTRK1  
NTRK2  
NTRK3  
SPHK1  
SPHK2  
CACNA1H  
VCP  
ABCB1  
LNPEP  
PLAA  
PRKCZ  
PLK4  
NEK1  
AGPAT2  
MMP7

CCNE2 CDK2 CCNE1  
FPR1  
LIPG  
MELK  
TNK2  
GYS1  
CACNA2D2  
SYK  
PDE3A  
PDE3B  
CDK5  
SMYD2  
INSR  
CCNA2 CDK2  
TAB1 MAP3K7  
MAP3K7  
MAP3K14



CCR1  
CCNC CDK8  
CDK8  
F9  
PRCP  
MAP3K5  
ABCC9  
PDGFRA PDGFRB  
SGK1  
HTR1D  
MAP3K11  
RAPGEF4  
ZAP70  
MAP3K9  
MAP3K10  
AURKC  
DLK1  
MAP3K2  
HPRT1  
BMP4  
PRKCD  
PRKCE  
PRKCQ  
BAZ2B  
BAZ2A  
F2RL3  
PDGFRA  
PDE8B  
TNNI3K  
PKM  
PIK3CA PIK3R1  
KCNJ6 KCNJ3  
KCNE1 KCNQ1  
KCNN4  
CBFB  
F12  
SHH  
PDE11A  
PDE1A  
P2RY1  
FAP  
  
CHRNA3 CHRNA6 CHRNA3  
ROCK2 ROCK1

PDE9A  
PDE1C  
TRPV3  
MAP3K12  
OGFRL1  
PNMT

CHRNA5 CHRNB2 CHRNA4  
CHKA  
CHRNA4 CHRNB2  
CHRNA3 CHRNB2  
SLC18A3  
MTAP  
ATAD2  
BLK  
CDK6  
RPS6KA1  
MST1R  
FGFR3  
CAMK2G  
LYN  
TEK  
WNK2  
PLK2  
MAPK11  
HTR1F  
CYP1B1  
AXL  
NEK2  
PTPRS  
MPG  
GLO1  
AKR1C4  
DAPK1  
AVPR2  
ESRRA  
MMP12  
PKN1  
NEK6  
NUAK1  
ARG1  
CAMK2B  
CAPN1  
HSP90AB1

GHSR  
PYGM  
SLC27A1  
PSENEN  
GSTP1  
GSTM2  
CASP1  
KDM4D  
PRTN3  
SMARCA2  
BMP1  
CCR3  
ST6GAL1  
PIK3R1  
PLA2G2A  
FPR2  
DDAH1  
ERBB4  
LPL  
SLC2A1  
SERPINE1  
ILK  
GPR39  
AVPR1A  
AVPR1B  
BDKRB1  
POLA1  
KARS  
BCL2A1  
RPS6KA2  
TTK  
PSMB8  
TTL  
UTS2R  
KCNA3  
BRD2  
BRD3  
PTGER3  
HSD3B1  
GPR18  
CISD1  
RGS4  
HMOX1  
KAT2B

GPR55

XPO1

ECE2

CCND3 CCND1 CDK4 CCND2

SREBF2

NR1H2

DHCR7

GLRA1

PRKCB

DHCR7 EBP

AGTR1

IL6ST

ASIC3

F7

PARP2

CCR8

GRIK2

ESRRB

ST14

NR5A2

NR5A1

TGFBR1

GABRA3

GABRA2

KCNN1

ICAM1

SELE

KCNJ11 ABCC9

NOD1

C1R

PDE6D
