# Supplementary material for: Network Pharmacology Study to Reveal the Potentiality of a Methanol Extract of Caesalpinia sappan L. Wood against Type-2 Diabetes Mellitus
Source: MDPI journal article supplement (doi:10.3390/life12020277), 2022-02-13
Supplement: s1 [file s1]

**Table S3: Common genes between SEA and STP:**

**Overlapping Genes-238**

CA2  
SLC13A5  
CA1  
CA3  
CA12  
CA14  
CA5B  
CA13  
SI  
MAOA  
MAOB  
CA7  
ESR2  
CA6  
CA4  
CA5A  
KDM2A  
KDM4A  
GABRR1  
KDM4C  
FTO  
GAA  
ALPL  
NAALAD2  
ALOX5  
MMP9  
MMP1  
AKR1C3  
HSPA1A  
AKR1C2  
KDM7A  
APEX1  
ACHE  
PTGS2  
ODC1  
CASP7  
SLC22A6  
F2  
GABBR1  
GBA2

CYP1A2  
MB  
HSD17B3  
NQO2  
KCNMA1  
GPR84  
RPS6KA3  
HSD17B2  
FABP4  
TTR  
PLAU  
MGLL

TUBB1  
TLR9  
PLA2G10  
DHFR  
TOP2A  
PTPRC  
TNKS  
CES1  
GSTA1  
METAP2  
ELANE  
HTR2A  
PRSS1  
CYP19A1  
CYP11B1  
CYP11B2  
CYP17A1  
TBXAS1  
PRKCA  
EPHX1  
TAAR1  
ADRA1A  
P2RX7  
NAAA  
MPO  
NR3C1  
PGR  
VDR  
ADH1A  
CTSV  
ADH1C

XDH  
DBH  
SNCA  
TYR  
PDGFRB  
NQO1  
SRD5A1  
SRD5A2  
AR  
SERPINA6  
NR3C2  
SHBG  
DRD2  
HSD11B1  
HTR7  
TRPV1  
FAAH  
THRB  
DRD3  
EPHX2  
NPC1L1  
PPARA  
PPARD  
MTNR1A  
MTNR1B  
HSD11B2  
POLB  
ACP1  
GSR  
GLI1  
PDE4B  
ABCG2  
TSPO  
BCHE  
NR1H2  
CDC25A  
ADORA3  
ESR1  
RORA  
G6PD  
CES2  
HMGCR  
HSD17B7  
NPY5R

CNR1  
CRHR1  
CYP24A1  
FABP3  
CYP3A4

ADCY10  
ERN1  
PPARG  
CNR2  
NR1H3  
CSF1R  
RORC  
CD38  
LYPLA1  
LYPLA2  
TERT  
NR1H4  
PTGER4  
RARB  
PAFAH1B2  
APP  
PTGFR  
GPBAR1  
LTB4R  
TOP1  
CDC25B  
PDE4D  
ALOX12  
PTGER2  
PTGIR  
OXER1  
FFAR4  
EDNRA  
ENPP2  
HNF4A  
STS  
MPEG1  
HCRTR2  
DAGLA  
PLG  
PLAT  
ALDH2  
CYP27B1

MAPT  
AKR1C1  
ADH1B  
ADH7  
AHR  
TBXA2R  
DHODH  
HSD17B1  
NOX4  
NOX1  
EP300  
HCRTR1  
HTR1A  
CFTR  
CASP4  
CASP9  
ITK  
AADAT  
KYAT3  
CYP2C19  
TYMP  
PHLPP2  
ADK  
ABCC1  
RELA  
DNM1  
RNPEP  
PLA2G2C  
S1PR3  
SPHK1  
VCP  
ABCB1  
LNPEP  
GYS1  
HPRT1  
PRKCE  
BAZ2B  
BAZ2A  
F2RL3  
CBFB  
SHH  
PNMT  
CYP1B1  
PTPRS

GLO1  
AKR1C4  
NEK6  
SMARCA2  
ST6GAL1

PLA2G2A  
POLA1  
KCNA3  
PTGER3  
HSD3B1  
GPR18  
CISD1  
RGS4  
KAT2B  
GPR55  
SREBF2  
NR1H2  
ASIC3  
F7  
PARP2  
CCR8

GRIK2  
NOD1  
C1R
