# Supplementary material for: Network Pharmacology Study to Reveal the Potentiality of a Methanol Extract of Caesalpinia sappan L. Wood against Type-2 Diabetes Mellitus
Source: MDPI journal article supplement (doi:10.3390/life12020277), 2022-02-13
Supplement: s1 [file s1]

**Table S4: Common genes between T2DM related targets and compound related overlapping genes:**

Overlapping genes between CRO and T2DM  
genes (124 genes)

CA2  
CA1  
SI  
MAOA

CA6  
FTO  
ALOX5  
MMP9  
MMP1  
HSPA1A  
ACHE  
PTGS2  
ODC1  
F2  
CYP1A2  
MB  
KCNMA1  
FABP4  
TTR  
TLR9  
PLA2G10

METAP2  
ELANE  
HTR2A  
PRSS1  
CYP19A1  
CYP11B2  
CYP17A1  
PRKCA  
TAAR1  
ADRA1A  
P2RX7  
NAAA

MPO

NR3C1

VDR

ADH1C

DBH

SNCA

NQO1

SRD5A2

AR

NR3C2

SHBG

DRD2

HSD11B1

TRPV1

THRB

NPC1L1

PPARA

PPARD

MTNR1A

MTNR1B

HSD11B2

ACP1

GSR

ABCG2

TSPO

BCHE

NR1I2

ESR1

G6PD

CES2

HMGCR

HSD17B7

CNR1

CYP24A1

FABP3

CYP3A4

ERN1

PPARG

CNR2

NR1H3

CSF1R

RORC

CD38

LYPLA1  
TERT  
NR1H4  
APP

GPBAR1

LTB4R

PDE4D  
ALOX12  
OXER1  
FFAR4  
EDNRA  
HNF4A  
STS  
PLG  
PLAT  
ALDH2  
CYP27B1  
MAPT  
ADH1B  
AHR  
TBXA2R  
NOX4  
NOX1  
EP300  
HCRTR1  
CFTR  
CASP9  
CYP2C19  
ABCC1  
RELA  
SPHK1  
ABCB1  
LNPEP  
GYS1  
F2RL3  
GLO1  
NEK6  
ST6GAL1  
PLA2G2A  
HSD3B1  
CISD1

KAT2B  
GPR55  
SREBF2  
NR1H2  
F7  
PARP2  
NOD1
