# Supplementary material for: Network Pharmacology Study to Reveal the Potentiality of a Methanol Extract of Caesalpinia sappan L. Wood against Type-2 Diabetes Mellitus
Source: MDPI journal article supplement (doi:10.3390/life12020277), 2022-02-13
Supplement: s1 [file s1]

**Table S5:** Classification of PPI network ordering based on Degree algorithm for 124 common targets

| Genes   | Degree | Genes   | Degree | Genes  | Degree |
|---------|--------|---------|--------|--------|--------|
| PPARG   | 36     | CASP9   | 11     | SPHK1  | 6      |
| PTGS2   | 35     | HMGCR   | 11     | ABCC1  | 6      |
| CYP3A4  | 35     | NR1H3   | 10     | GPBAR1 | 5      |
| PPARA   | 33     | TRPV1   | 10     | FFAR4  | 5      |
| ESR1    | 30     | CYP27B1 | 10     | F7     | 5      |
| EP300   | 28     | CFTR    | 10     | ODC1   | 5      |
| MMP9    | 24     | GPR55   | 9      | TSPO   | 5      |
| CYP2C19 | 24     | SHBG    | 9      | ALDH2  | 5      |
| CYP19A1 | 21     | PLA2G10 | 9      | ADH1B  | 5      |
| AHR     | 21     | HTR2A   | 9      | CA1    | 5      |
| AR      | 21     | NOX4    | 8      | F2RL3  | 4      |
| NR3C1   | 21     | PPARD   | 8      | MTNR1A | 4      |
| CYP1A2  | 20     | FABP4   | 8      | NAAA   | 4      |
| CYP17A1 | 19     | NR1H2   | 8      | CD38   | 4      |
| RELA    | 19     | MMP1    | 8      | KCNMA1 | 4      |
| MPO     | 18     | TLR9    | 8      | LTB4R  | 4      |
| HSPA1A  | 17     | SRD5A2  | 8      | GLO1   | 4      |
| APP     | 17     | NR3C2   | 8      | ACP1   | 4      |
| HNF4A   | 17     | STS     | 8      | CES2   | 4      |
| ABCB1   | 17     | PLA2G2A | 8      | P2RX7  | 3      |
| F2      | 16     | VDR     | 8      | FTO    | 3      |
| PLG     | 16     | NOX1    | 8      | THRB   | 3      |
| MAOA    | 15     | MAPT    | 8      | CSF1R  | 3      |
| CNR1    | 15     | TERT    | 7      | CISD1  | 3      |
| HSD3B1  | 14     | HSD11B2 | 7      | ERN1   | 3      |
| GSR     | 14     | CYP11B2 | 7      | ADH1C  | 3      |
| NR1H4   | 14     | CNR2    | 7      | METAP2 | 2      |
| NR1I2   | 14     | ELANE   | 7      | LYPLA1 | 2      |
| ABCG2   | 14     | MB      | 7      | GYS1   | 2      |
| PRKCA   | 13     | PRSS1   | 7      | HCRTR1 | 2      |
| NQO1    | 13     | KAT2B   | 7      | TAAR1  | 2      |
| HSD11B1 | 12     | NPC1L1  | 6      | NOD1   | 2      |
| ALOX5   | 12     | FABP3   | 6      | RORC   | 2      |
| ACHE    | 12     | HSD17B7 | 6      | LNPEP  | 1      |
| DRD2    | 12     | MTNR1B  | 6      | EDNRA  | 1      |
| SREBF2  | 11     | CA2     | 6      | PARP2  | 1      |
| BCHE    | 11     | PLAT    | 6      | CA6    | 1      |
| TTR     | 11     | ALOX12  | 6      | OXER1  | 1      |

|         |    |        |   |        |   |
|---------|----|--------|---|--------|---|
| G6PD    | 11 | TBXA2R | 6 | ADRA1A | 1 |
| SNCA    | 11 | SI     | 6 |        |   |
| CYP24A1 | 11 | DBH    | 6 |        |   |

**Table S5.1:** Substances are categorized in the Compound-Targets network according to degree value of importance

| Rank | Compounds                                                               | Degree | Rank | Compounds                                                                                               | Degree |
|------|-------------------------------------------------------------------------|--------|------|---------------------------------------------------------------------------------------------------------|--------|
| 1    | Fisetin tetramethyl ether                                               | 27     | 18   | Z,Z-10,12-Hexadecadien-1-ol acetate                                                                     | 3      |
| 2    | 9,12-Octadecadienoic Acid (Z,Z)-                                        | 25     | 19   | 4-phenylpyrido[2,3-d]pyrimidine                                                                         | 2      |
| 3    | 2,4-Dimethoxybenzyl alcohol                                             | 24     | 20   | Benzo[h]quinoline, 2,4-dimethyl-                                                                        | 1      |
| 4    | Clionasterol                                                            | 20     | 21   | 4-Cyclohexene-1,2-dicarboximide, N-butyl-, cis-                                                         | 1      |
| 5    | Cholest-4-En-3-One                                                      | 19     | 22   | 6-Amino-5-cyano-4-(5-cyano-2,4-dimethyl-1H-pyrrol-3-yl)-2-methyl-4H-pyran-3-carboxylic acid ethyl ester | 1      |
| 6    | Tetramethylkaempferol                                                   | 18     | 23   | 2-adamantanyl-N-(adamantanylethyl)acetamide                                                             | 1      |
| 7    | 9,12-Octadecadienoic acid, methyl ester                                 | 18     | 24   | 2(1H)-Naphthalenone, octahydro-4a-methyl-7-(1-methylethyl)-, (4a.alpha.,7.beta.,8a.beta.)-              | 1      |
| 8    | 1,3-Benzenediol, Monoacetate                                            | 12     | 25   | 3-Methyl-2-Pentyl-2-Cyclopenten-1-One                                                                   | 1      |
| 9    | Neozepam                                                                | 10     | 26   | Ethyl 2-Methylpropanoate                                                                                | 1      |
| 10   | Hydroquinone                                                            | 8      | 27   | 2-(4-methylphenyl) Indolizine                                                                           | 0      |
| 11   | Cholestane, 3,4-epoxy-2-methyl-, (2.alpha.,3.alpha.,4.alpha.,5.alpha.)- | 7      | 27   | 2-[(4E)-4-Hexenyl]-6-nitrocyclohexanone dimethylhydrazone                                               | 0      |
| 12   | Dehydrodiisoeugenol                                                     | 7      | 27   | Disalicylalpropylenediimine                                                                             | 0      |
| 13   | Tetradecanoic Acid, 12-Methyl-, Methyl Ester                            | 7      | 27   | 1,3-Dimethyl-5,6-dicarbethoxy-5,6,7,8-tetrahydro-6,7-diazalumazine                                      | 0      |
| 14   | Indole-2-one, 2,3-dihydro-N-hydroxy-4-methoxy-3,3-dimethyl-             | 6      | 27   | Nadolol di-methylboronic acid                                                                           | 0      |

|    |                                                                                |   |    |                                         |   |
|----|--------------------------------------------------------------------------------|---|----|-----------------------------------------|---|
| 15 | 1,3-Benzenediol                                                                | 5 | 27 | Aspidodispermine, O-methyl-             | 0 |
| 16 | 5-methyl-2-phenyl- 1H-Indole                                                   | 4 | 27 | (3E)-5-Hydroxy-2-methyl-3-hexenoic acid | 0 |
| 17 | Propenone, 1-[5-(3-hydroxy-3-methyl-1-butynyl)-2-thienyl]-3-(4-methoxyphenyl)- | 4 |    |                                         |   |

**Table S5.2:** Enrichment of T2DM-associated common target genes in 9 KEGG pathways

| Terms                                            | Genes                                                                                                                                                                                                               | Q-value  |
|--------------------------------------------------|---------------------------------------------------------------------------------------------------------------------------------------------------------------------------------------------------------------------|----------|
| hsa03320:PPAR signaling pathway                  | FABP3, FABP4, MMP1, NR1H3, PPARG, PPARGA, PPARGD                                                                                                                                                                    | 0.002672 |
| hsa04976:Bile secretion                          | ABCB1, CA2, NR1H4, HMGCR, CFTR, ABCG2                                                                                                                                                                               | 0.014743 |
| hsa05200:Pathways in cancer                      | CSF1R, MMP1, PRKCA, PTGS2, MMP9, RELA, CASP9, AR, EDNRA, EP300, PPARG, F2RL3, PPARGD                                                                                                                                | 0.077293 |
| hsa04020:Calcium signaling pathway               | P2RX7, EDNRA, TBXA2R, SPHK1, CD38, PRKCA, HTR2A, ADRA1A                                                                                                                                                             | 0.114384 |
| hsa01100:Metabolic pathways                      | ADH1C, MAOA, ADH1B, ODC1, ALOX12, HMGCR, DBH, CYP2C19, HSD17B7, CYP3A4, PTGS2, CYP19A1, CYP17A1, HSD11B1, CYP27B1, ALDH2, SI, ALOX5, CD38, ST6GAL1, G6PD, SPHK1, PLA2G2A, HSD3B1, CYP24A1, CYP11B2, CYP1A2, PLA2G10 | 0.165218 |
| hsa04919:Thyroid hormone signaling pathway       | CASP9, KAT2B, THRB, EP300, PRKCA, ESR1                                                                                                                                                                              | 0.202243 |
| hsa04152:AMPK signaling pathway                  | GYSI, HNF4A, PPARG, HMGCR, ADRA1A, CFTR                                                                                                                                                                             | 0.261061 |
| hsa05202:Transcriptional misregulation in cancer | CSF1R, PPARG, PLAT, MPO, MMP9, RELA, ELANE                                                                                                                                                                          | 0.303411 |
| hsa05215:Prostate cancer                         | CASP9, AR, SRD5A2, EP300, RELA                                                                                                                                                                                      | 0.351174 |

**Table S5.3:** Concrete information on the chemical interactions of key substance with the genes involved in PPAR signaling pathway

| Gene  | Ligand-Protein complex           | Binding Interaction                                       |                                                                             |        |
|-------|----------------------------------|-----------------------------------------------------------|-----------------------------------------------------------------------------|--------|
|       |                                  | Hydrogen Bond                                             | Hydrophobic interactions                                                    | Others |
| PPARG | 3E00 - Fisetin Tetramethyl Ether | ARG-288, SER-342, ILE-262, GLY-258, LEU-340, GLU-259 (11) | ARG-288, ILE-249, LEU-333, LEU-255, ARG-280, ILE-281, CYS-285, ILE-341 (12) | -      |

|       |                                        |                                                                         |                                                     |                                                                |
|-------|----------------------------------------|-------------------------------------------------------------------------|-----------------------------------------------------|----------------------------------------------------------------|
| PPARA | 1K7L - Fisetin<br>Tetramethyl<br>Ether | ASN-219, GLU-286, TYR-334,<br>CYS-278, ILE-317, MET-220 (7)             | TYR-334, ALA-333, CYS-278, ILE-<br>317, LEU-321 (7) | MET-320 (1) Pi-<br>Sulfur                                      |
| PPARD | 5U3Q - Fisetin<br>Tetramethyl<br>Ether | MET-192, ALA-306, ASN-307,<br>PHE-190, GLU-259, LEU-304,<br>ILE-290 (8) | LEU-304, ILE-290, LEU-294, LYS-<br>229 (5)          | GLU-259<br>(Electrostatic) (1),<br>MET-293 (Pi- Sulfur)<br>(1) |
| FABP3 | 5HZ9 - Fisetin<br>Tetramethyl<br>Ether | GLU-62, THR-61, THR-74,<br>THR-75, ASN-60, ASP-72, ASP-<br>78 (9)       | -                                                   | LYS-59, ASP-78<br>(Electrostatic) (2)                          |
| FABP4 | 3P6D - Fisetin<br>Tetramethyl<br>Ether | GLU-61, THR-60, ASN-59,<br>VAL-73, ASP-71 (9)                           | VAL-73 (3)                                          | -                                                              |
| MMP1  | 1SU3 - Fisetin<br>Tetramethyl<br>Ether | HOH-951, GLN-50, SER-172,<br>PRO-173, GLU-39, LYS-36,<br>ASN-43 (8)     | LYS-36, LYS-40, PRO-95 (6)                          | -                                                              |
| NR1H3 | 1UHL - Fisetin<br>Tetramethyl<br>Ether | LYS-317, THR-314, PHE-315,<br>SER-228 (5)                               | ARG-305, ARG-226, PHE-315,<br>LYS-317 (6)           | -                                                              |
